# Supplementary material for: Differential Sperm Motility Mediates the Sex Ratio Drive Shaping Mouse Sex Chromosome Evolution
Source: PubMed Central journal article supplement (PMC6839398; doi:10.1016/j.cub.2019.09.031), 2019-11-04
Supplement: mmc1.pdf [file mmc1.pdf]

**Current Biology, Volume 29**

**Supplemental Information**

**Differential Sperm Motility Mediates the Sex**

**Ratio Drive Shaping Mouse Sex Chromosome Evolution**

**Claudia Cattoni Rathje, Emma Elizabeth Philippa Johnson, Deborah Drage, Christina Patinioti, Giuseppe Silvestri, Nabeel Ahmed Affara, Côme Ialy-Radio, Julie Cocquet, Benjamin Matthew Skinner, and Peter James Ivor Ellis**

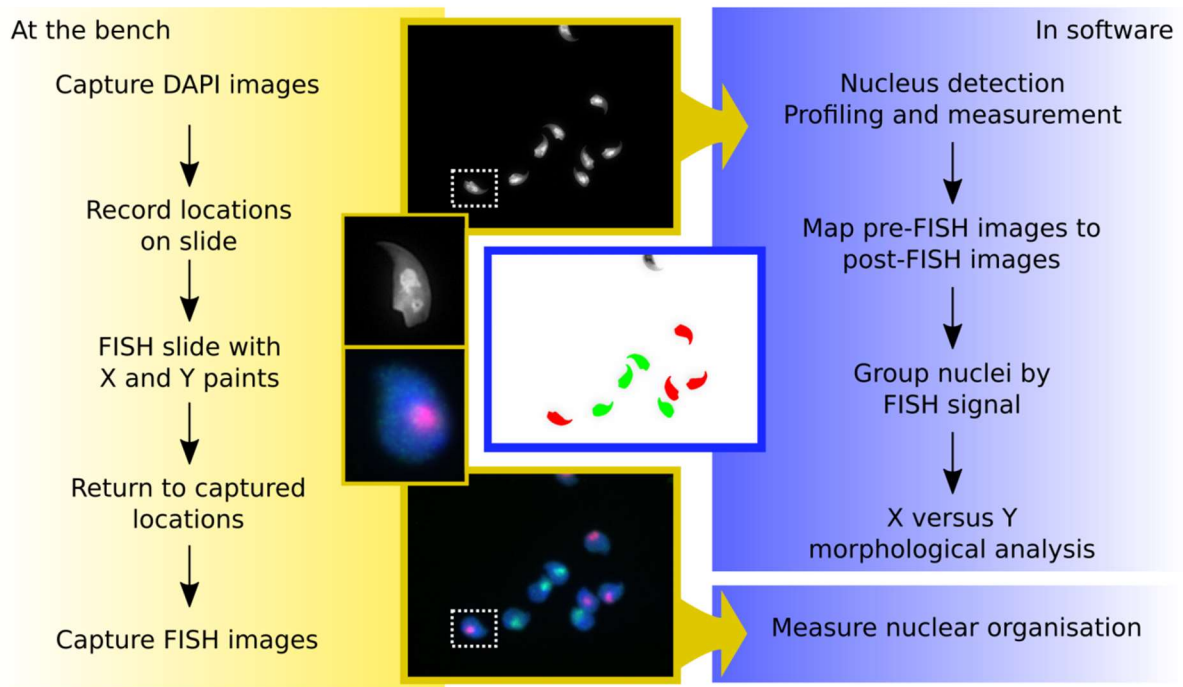

**Figure S1. Flowchart showing the capture-recapture protocol. Related STAR Methods.** Flowchart showing the capture-recapture protocol. The extensive swelling required for FISH probes to penetrate the nucleus (inset nuclei show before and after FISH) requires storing slide coordinates and imaging the slide before and after FISH for morphology analysis and subsequent XY grouping. A software user interface allows simple assignment of pre-FISH nuclei based on post-FISH images.

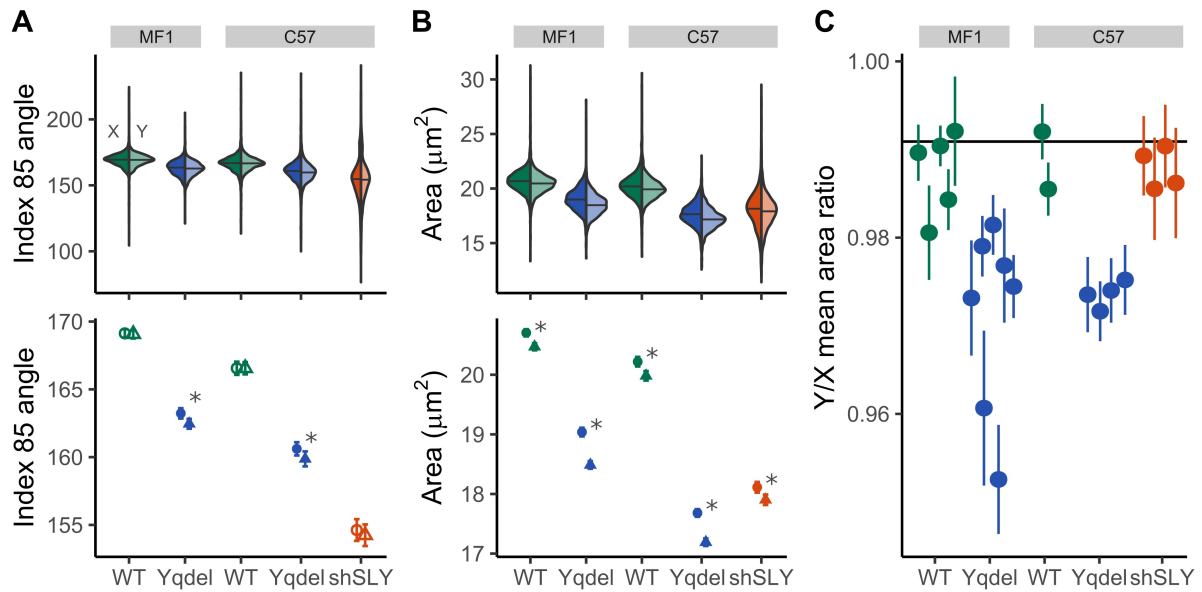

**Figure S2. Detailed differences in sperm shape and size. Related to Figure 2.** A) Angles at profile index 85 in each strain, comparing X- and Y-bearing sperm. The upper panel shows violin plots of the complete population data for each strain, while the lower panel shows the mean and standard error of the mean in order to highlight differences. Significant XY differences (Mann-Whitney test,  $p < 0.05$ ) are marked '\*'. Y-bearing sperm have a significantly more curved acrosome in Yqdel animals only. B) Comparison of nuclear areas, using the same format as (A); Y-bearing sperm are consistently smaller than X-bearing sperm in all genotypes including wild types. C) Comparison of the mean Y/X area ratio in each sample (see Table S1 for the details of sample numbers analysed per genotype), with standard error of the mean. The horizontal line indicates the mean wild type ratio. Wild type and shSLY samples have similar area ratios, while Yqdel samples show a further reduction in Y area.

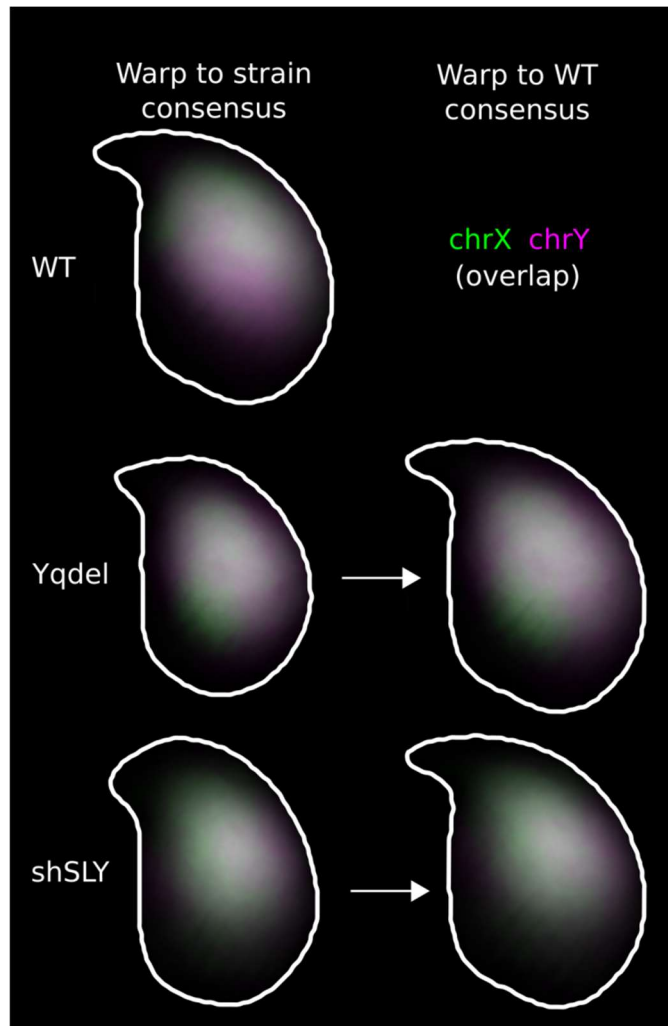

**Figure S3. Comparison of chromosome positions in WT versus Yq-del sperm. Related to Figure 2.** Chromosome territories for X and Y are sub-acrosomal in C57Bl6, and strongly overlap in all genotypes analysed (MS-SSIM\* 0.86-0.94). Following warping to a WT template, the location of the X and Y chromosomes in sperm from Yqdel and shSLY males closely resembles their locations in wild type C57Bl6 sperm (MS-SSIM\* 0.82-0.86). This indicates morphological changes are external to the nucleus, and do not involve other chromatin reorganisation.

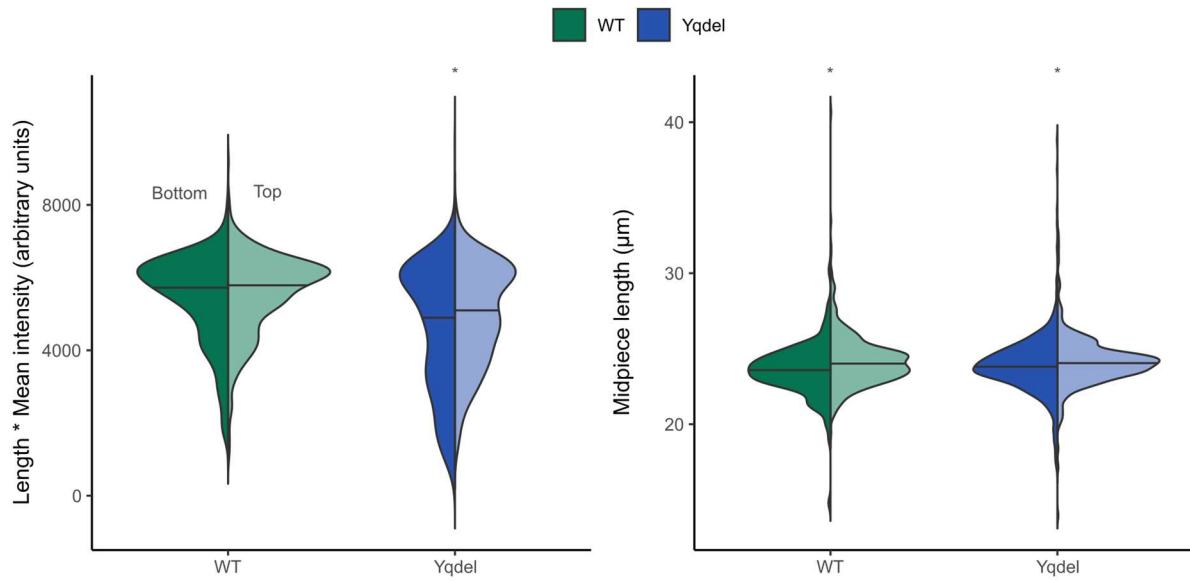

**Figure S4. Poorer swimming sperm have lower mitochondrial activity. Related to Figure 4.** Midpiece length multiplied by mean signal is a proxy for total mitochondrial activity. Horizontal lines show sample medians. A two-sample two-tailed Kolmogorov-Smirnov test detects no difference between top and bottom for multiplied values in wild type  $XY^{RIII}$  ( $p=0.73$ ) and a significant difference in  $XY^{RIII}qdel$  ( $p=7.15E-05$ ). Midpiece length is a proxy for mitochondrial count, and is slightly higher in top fractions in both  $XY^{RIII}$  ( $p=0.0004$ ) and  $XY^{RIII}qdel$  ( $p=0.006$ ).

| <b>Protocol</b>                                                                    | <b>Paternal genotype</b> | <b>Number of males</b> | <b>Sperm status</b>                      | <b>Maternal details</b>             | <b>Number of offspring</b> | <b>Percent female offspring</b> | <b>S.E.P.</b> |
|------------------------------------------------------------------------------------|--------------------------|------------------------|------------------------------------------|-------------------------------------|----------------------------|---------------------------------|---------------|
| Colony data (Cambs)                                                                | XYRIIIqdel               | --                     | Pair or trio mating cages                | Predominantly MF1                   | 723                        | 54.9%                           | 1.85%         |
| Colony data (Cambs)                                                                | XYRIII                   | --                     | Pair or trio mating cages                | Predominantly MF1                   | 922                        | 47.2%                           | 1.64%         |
| Colony data (Kent)                                                                 | XYRIIIqdel               | --                     | Pair or trio mating cages                | MF1                                 | 526                        | 58.9%                           | 2.15%         |
| Colony data (Kent)                                                                 | XYRIII                   | --                     | Pair or trio mating cages                | MF1                                 | 534                        | 45.7%                           | 2.16%         |
| Colony data (France)                                                               | XYRIIIqdel               | --                     | Pair or trio mating cages                | >80% C57Bl6/N                       | 132                        | 61.4%                           | 4.24%         |
| Colony data (France)                                                               | XYRIII                   | --                     | Pair or trio mating cages                | >80% C57Bl6/N                       | 151                        | 51.7%                           | 4.07%         |
| Colony data (France)                                                               | shSLY                    | --                     | Pair or trio mating cages                | >80% C57Bl6/N                       | 16                         | 87.5%                           | 8.27%         |
| IVF, GFP scoring of blastocysts                                                    | XGFPYRIIIqdel            | 6                      | cauda epididymal sperm retrieved for IVF | CBAB6 F1 oocytes (cumulus retained) | 243                        | 44.4%                           | 3.19%         |
|                                                                                    |                          |                        |                                          | CBAB6 F1 oocytes (cumulus removed)  | 203                        | 44.8%                           | 3.49%         |
|                                                                                    |                          |                        |                                          | Total:                              | 446                        | 44.6%                           | 2.35%         |
| Superovulation, natural mating, 2-cell embryo recovery, GFP scoring of blastocysts | XGFPYRIIIqdel            | 9                      | fresh (3 day mating interval)            | CBAB6 F1                            | 173                        | 55.5%                           | 3.78%         |
|                                                                                    |                          |                        | aged (14+ day mating interval)           | CBAB6 F1                            | 251                        | 53.8%                           | 3.15%         |

|                                                                                    |                            |   |                                |                                   |     |       |       |
|------------------------------------------------------------------------------------|----------------------------|---|--------------------------------|-----------------------------------|-----|-------|-------|
|                                                                                    |                            | 4 | aged (14+ day mating interval) | MF1                               | 87  | 60.9% | 5.23% |
|                                                                                    |                            |   |                                | Total:                            | 511 | 55.6% | 2.20% |
| Superovulation, natural mating, 2-cell embryo recovery, GFP scoring of blastocysts | XGFPYR <sup>III</sup>      | 9 | fresh (3 day mating interval)  | CBAB6 F1                          | 150 | 50.0% | 4.08% |
|                                                                                    |                            |   | aged (14+ day mating interval) | CBAB6 F1                          | 104 | 47.1% | 4.89% |
|                                                                                    |                            | 4 | aged (14+ day mating interval) | MF1                               | 73  | 38.4% | 5.69% |
|                                                                                    |                            |   |                                | Total:                            | 327 | 46.5% | 2.76% |
| Natural mating (timed oestrus), GFP scoring of mid-gestation embryos               | XGFPYR <sup>III</sup> qdel | 7 | ~7 day mating interval         | XYR <sup>III</sup> daughters      | 143 | 58.0% | 4.13% |
|                                                                                    |                            |   | ~7 day mating interval         | XYR <sup>III</sup> qdel daughters | 159 | 54.7% | 3.95% |
|                                                                                    |                            |   |                                | Total:                            | 302 | 56.3% | 2.85% |
| Natural mating (timed oestrus), GFP scoring of mid-gestation embryos               | XGFPYR <sup>III</sup>      | 7 | ~7 day mating interval         | XYR <sup>III</sup> daughters      | 111 | 43.2% | 4.70% |
|                                                                                    |                            |   | ~7 day mating interval         | XYR <sup>III</sup> qdel daughters | 143 | 48.3% | 4.18% |
|                                                                                    |                            |   |                                | Total:                            | 254 | 46.1% | 3.13% |

**Table S1. Offspring sex ratios in animals in this study. Related to Figure 1.** Offspring sex ratios shift in favour of females under natural mating in animals carrying the Y<sup>RIII</sup>qdel chromosome compared to animals carrying the Y<sup>RIII</sup> chromosome when using both fresh and aged sperm; this difference is abolished by IVF using embryos with or without cumulus cells (see also **Figure 1**). S.E.P, standard error of proportion.

|            |              | WT                 |                    | Yqdel              |                    | shSLY              |                    |
|------------|--------------|--------------------|--------------------|--------------------|--------------------|--------------------|--------------------|
| Background | Cluster      | #X / #Y sperm      | %X ± S.E.P.        | #X / #Y sperm      | %X ± S.E.P.        | #X / #Y sperm      | %X ± S.E.P.        |
| MF1        | N1           | 995 / 946          | 51.3 ± 1.1%        | 68 / 47            | 59.1 ± 4.6%        | -                  | -                  |
|            | N2           | 1114 / 1022        | 52.2 ± 1.1%        | 135 / 113          | 54.4 ± 3.2%        | -                  | -                  |
|            | A1           | 35 / 24            | 59.3 ± 6.4%        | 1015 / 1053        | 49.1 ± 1.1%        | -                  | -                  |
|            | A2           | 53 / 49            | 52 ± 4.9%          | 420 / 568          | 42.5 ± 1.6%        | -                  | -                  |
|            | <b>Total</b> | <b>2197 / 2041</b> | <b>51.8 ± 0.8%</b> | <b>1638 / 1781</b> | <b>47.9 ± 0.9%</b> | -                  | -                  |
| C57Bl6     | N            | 969 / 961          | 50.2 ± 1.1%        | 65 / 47            | 58 ± 4.7%          | 2 / 1              | 66.7 ± 27.2%       |
|            | A1           | 58 / 46            | 55.8 ± 4.9%        | 808 / 776          | 51 ± 1.3%          | 33 / 26            | 55.9 ± 6.5%        |
|            | A2           | 20 / 21            | 48.8 ± 7.8%        | 190 / 217          | 46.7 ± 2.5%        | 198 / 161          | 55.2 ± 2.6%        |
|            | A3           | 17 / 18            | 48.6 ± 8.4%        | 47 / 48            | 49.5 ± 5.1%        | 943 / 963          | 49.5 ± 1.1%        |
|            | B1           | 194 / 189          | 50.7 ± 2.6%        | 374 / 356          | 51.2 ± 1.9%        | 346 / 321          | 51.9 ± 1.9%        |
|            | B2           | 104 / 119          | 46.6 ± 3.3%        | 220 / 203          | 52 ± 2.4%          | 290 / 295          | 49.6 ± 2.1%        |
|            | S            | 30 / 30            | 50 ± 6.5%          | 155 / 122          | 56 ± 3%            | 669 / 690          | 49.2 ± 1.4%        |
|            | <b>Total</b> | <b>1392 / 1384</b> | <b>50.1 ± 0.1%</b> | <b>1859 / 1769</b> | <b>51.2 ± 0.1%</b> | <b>2481 / 2457</b> | <b>50.2 ± 0.1%</b> |

**Table S2. Number and proportion of X- and Y-bearing sperm in each morphological cluster. Related to Figure 3.** On an MF1 background, more abnormal sperm are enriched for Y-bearing sperm (Fisher's exact test,  $p=0.002$ ) in Yqdel samples, but not in WT samples ( $p=1$ ). On the C57Bl6 background, a similar gradient is observed in Yqdel and shSLY samples, but is not statistically significant in these ( $p=0.63$ ,  $0.66$ ), or in WT ( $p=1$ ). S.E.P, standard error of proportion.



| Type      | Sample           | Number of animals | Ages (weeks) | n cells | X    | Y    | Average X area | Average Y area | Y/X area ratio | Area difference | S.E.M.      | Volume difference | S.E.M.      |
|-----------|------------------|-------------------|--------------|---------|------|------|----------------|----------------|----------------|-----------------|-------------|-------------------|-------------|
| MF1 WT    | WT P1            | 8                 | 13 - 16      | 1219    | 634  | 585  | 20.78          | 20.56          | 99.0%          | 1.0%            | 0.3%        | 1.6%              | 0.5%        |
|           | WT P2            | 8                 | 10 - 14      | 777     | 426  | 351  | 20.37          | 20.05          | 98.4%          | 1.6%            | 0.3%        | 2.3%              | 0.5%        |
|           | WT I1            | 1                 | 10.9         | 1524    | 777  | 747  | 20.93          | 20.73          | 99.0%          | 1.0%            | 0.2%        | 1.4%              | 0.3%        |
|           | WT I2            | 1                 | 29.7         | 305     | 150  | 155  | 20.76          | 20.59          | 99.2%          | 0.8%            | 0.6%        | 1.2%              | 0.9%        |
|           | WT I3            | 1                 | 26.1         | 413     | 210  | 203  | 20.28          | 19.88          | 98.1%          | 1.9%            | 0.5%        | 2.9%              | 0.8%        |
|           | <i>Average</i>   |                   |              |         |      |      | 20.62          | 20.36          | 98.7%          | 1.3%            | 0.2%        | 1.9%              | 0.3%        |
|           | <b>Aggregate</b> |                   |              |         | 4238 | 2197 | 2041           | <b>20.70</b>   | <b>20.47</b>   | <b>98.9%</b>    | <b>1.1%</b> | <b>0.2%</b>       | <b>1.7%</b> |
| MF1 Yqdel | Yqdel P1         | 5                 | 11 - 14.5    | 904     | 386  | 518  | 18.50          | 18.02          | 97.4%          | 2.6%            | 0.4%        | 3.8%              | 0.5%        |
|           | Yqdel P2         | 6                 | 9.3          | 308     | 119  | 189  | 18.93          | 18.03          | 95.3%          | 4.7%            | 0.6%        | 7.0%              | 0.9%        |
|           | Yqdel I1         | 1                 | 11           | 860     | 440  | 420  | 19.76          | 19.35          | 97.9%          | 2.1%            | 0.3%        | 3.1%              | 0.5%        |
|           | Yqdel I2         | 1                 | 11           | 262     | 136  | 126  | 18.79          | 18.35          | 97.7%          | 2.3%            | 0.6%        | 3.5%              | 1.0%        |
|           | Yqdel I3         | 1                 | 11           | 574     | 279  | 295  | 18.93          | 18.58          | 98.1%          | 1.9%            | 0.3%        | 2.8%              | 0.5%        |
|           | Yqdel I4         | 1                 | 31.3         | 177     | 91   | 86   | 19.31          | 18.55          | 96.1%          | 3.9%            | 0.9%        | 5.8%              | 1.3%        |
|           | Yqdel I5         | 1                 |              | 187     | 94   | 93   | 18.44          | 17.94          | 97.3%          | 2.7%            | 0.7%        | 4.0%              | 1.0%        |

|                         |                  |   |      |      |      |      |              |              |              |             |             |             |             |
|-------------------------|------------------|---|------|------|------|------|--------------|--------------|--------------|-------------|-------------|-------------|-------------|
|                         | <i>Average</i>   |   |      |      |      |      | 18.95        | 18.40        | 97.1%        | 2.9%        | 0.4%        | 4.3%        | 0.5%        |
|                         | <b>Aggregate</b> |   |      | 3419 | 1638 | 1781 | <b>19.01</b> | <b>18.49</b> | <b>97.3%</b> | <b>2.7%</b> | <b>0.2%</b> | <b>4.1%</b> | <b>0.3%</b> |
| <b>C57BI6<br/>WT</b>    | WT 1             | 1 | 24.6 | 1541 | 784  | 757  | 20.30        | 20.01        | 98.6%        | 1.4%        | 0.3%        | 2.2%        | 0.5%        |
|                         | WT 2             | 1 | 24.6 | 1235 | 608  | 627  | 20.11        | 19.95        | 99.2%        | 0.8%        | 0.3%        | 1.2%        | 0.5%        |
|                         | <i>Average</i>   |   |      |      |      |      | 20.21        | 19.98        | 98.9%        | 1.1%        | 0.8%        | 1.7%        | 1.1%        |
|                         | <b>Aggregate</b> |   |      | 2776 | 1392 | 1384 | <b>20.22</b> | <b>19.98</b> | <b>98.8%</b> | <b>1.2%</b> | <b>0.2%</b> | <b>1.8%</b> | <b>0.3%</b> |
| <b>C57BI6<br/>Yqdel</b> | Yqdel 1          | 1 | 14.6 | 1102 | 566  | 536  | 17.94        | 17.47        | 97.4%        | 2.6%        | 0.4%        | 3.9%        | 0.5%        |
|                         | Yqdel 2          | 1 | 14.6 | 1101 | 594  | 507  | 17.87        | 17.36        | 97.2%        | 2.8%        | 0.3%        | 4.2%        | 0.5%        |
|                         | Yqdel 3          | 1 | 11.4 | 690  | 344  | 346  | 17.60        | 17.14        | 97.4%        | 2.6%        | 0.4%        | 3.9%        | 0.6%        |
|                         | Yqdel 4          | 1 | 11.4 | 735  | 355  | 380  | 17.04        | 16.62        | 97.5%        | 2.5%        | 0.4%        | 3.7%        | 0.6%        |
|                         | <i>Average</i>   |   |      |      |      |      | 17.61        | 17.15        | 97.4%        | 2.6%        | 0.1%        | 3.9%        | 0.1%        |
|                         | <b>Aggregate</b> |   |      | 3628 | 1859 | 1769 | <b>17.68</b> | <b>17.19</b> | <b>97.2%</b> | <b>2.8%</b> | <b>0.2%</b> | <b>4.1%</b> | <b>0.3%</b> |
| <b>C57BI6<br/>shSLY</b> | shSLY 1          | 1 | 14.9 | 1149 | 587  | 562  | 17.89        | 17.65        | 98.6%        | 1.4%        | 0.6%        | 2.1%        | 0.9%        |
|                         | shSLY 2          | 1 | 24.6 | 1261 | 653  | 608  | 17.84        | 17.65        | 98.9%        | 1.1%        | 0.5%        | 1.6%        | 0.7%        |
|                         | shSLY 3          | 1 | 24.6 | 1368 | 666  | 702  | 17.99        | 17.81        | 99.0%        | 1.0%        | 0.5%        | 1.4%        | 0.7%        |

|  |                  |   |      |      |      |      |              |              |              |             |             |             |             |
|--|------------------|---|------|------|------|------|--------------|--------------|--------------|-------------|-------------|-------------|-------------|
|  | shSLY 4          | 1 | 24.6 | 1160 | 575  | 585  | 18.80        | 18.53        | 98.6%        | 1.4%        | 0.6%        | 2.2%        | 0.9%        |
|  | <i>Average</i>   |   |      |      |      |      | <i>18.13</i> | <i>17.91</i> | <i>98.8%</i> | <i>1.2%</i> | <i>0.1%</i> | <i>1.8%</i> | <i>0.2%</i> |
|  | <b>Aggregate</b> |   |      | 4938 | 2481 | 2457 | <b>18.11</b> | <b>17.90</b> | <b>98.8%</b> | <b>1.2%</b> | <b>0.3%</b> | <b>1.7%</b> | <b>0.4%</b> |

**Table S3. Details of the individual samples analysed, and the measured size differences in X- and Y- bearing sperm. Related to Figure 2 and Figure 3.** Details of the individual samples analysed, and the measured size differences in X- and Y- bearing sperm. S.E.M, standard error of the mean. The volume difference was calculated from area, assuming an equivalent reduction in sperm thickness.

|                      | Estimate  | Std. Error | z value | Pr(> z ) |
|----------------------|-----------|------------|---------|----------|
| (Intercept)          | 0.015374  | 0.018551   | 0.829   | 0.407    |
| Segment              | -0.010992 | 0.004764   | -2.307  | 0.021    |
| Strain alone         | 0.038406  | 0.026236   | 1.464   | 0.143    |
| Live/dead state      | -0.142011 | 0.024665   | -5.758  | 8.53E-09 |
| Segment:Strain       | -0.001866 | 0.006737   | -0.277  | 0.782    |
| Segment:State        | 0.032999  | 0.006333   | 5.211   | 1.88E-07 |
| Strain:State         | 0.231879  | 0.034883   | 6.647   | 2.98E-11 |
| Segment:Strain:State | -0.049502 | 0.008956   | -5.527  | 3.25E-08 |

**Table S4. Summary of the beta regression on swim-up data, showing the significance of each parameter and their interactions. Related to Figure 4.** Summary of the beta regression on swim-up data, showing the significance of each parameter and their interactions. The pseudo  $R^2$  was 0.87.
